# Supplementary material for: Anomalous freezing behavior of nanoscale liposomes
Source: Royal Society of Chemistry journal article supplement (doi:10.1039/c2sm25974e), 2012-01-01
Supplement: c2sm25974e.pdf [file c2sm25974e.pdf]

## Supplementary Document

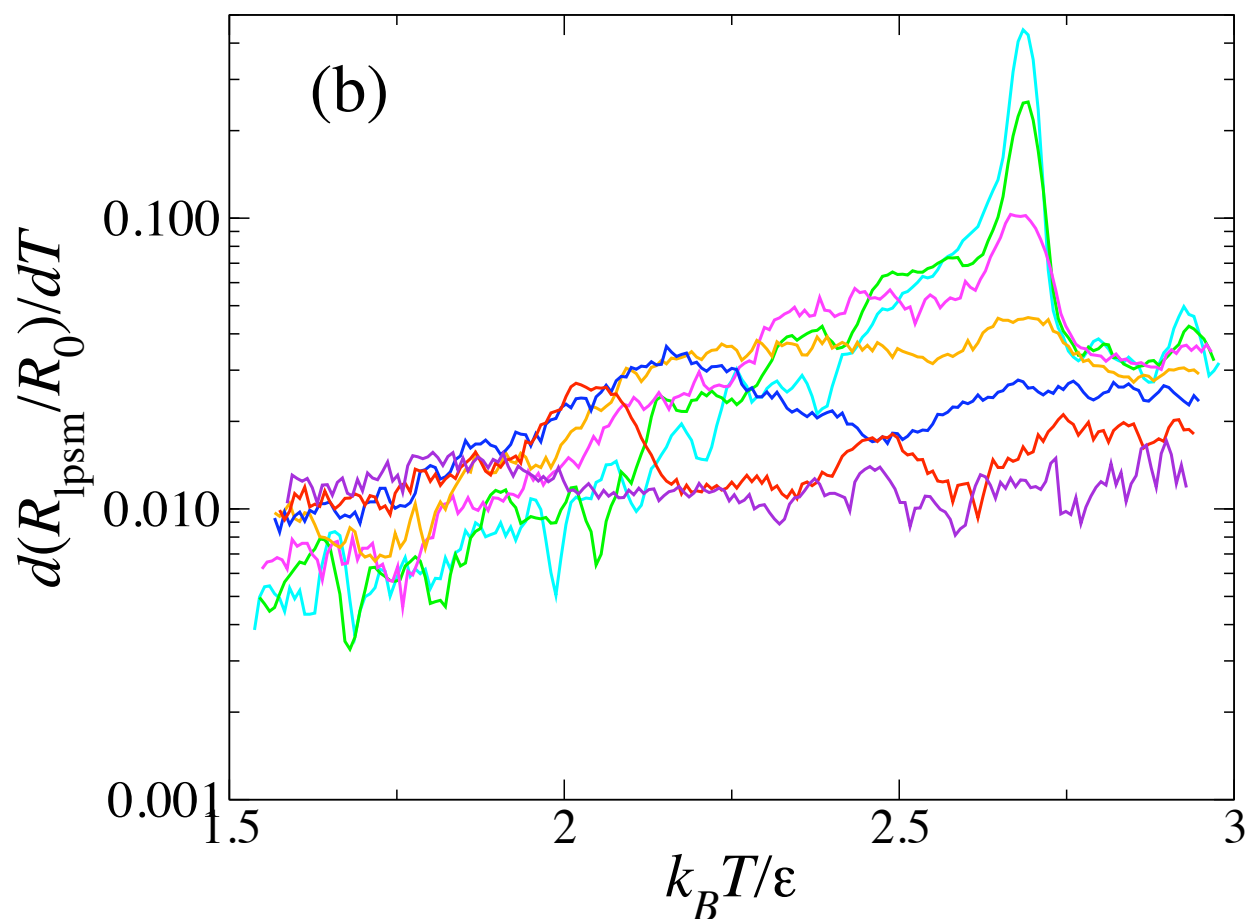

Caption: Temperature rate of Liposomes radius, vs. temperature. Curves from top to bottom at  $k_B T=2.6$  correspond to liposomes composed of 80 000, 40 000, 20 000, 10 000, 5 000, 2 500, and 1 500 lipids, respectively.
